# Supplementary material for: Understanding narwhal diving behaviour using Hidden Markov Models with dependent state distributions and long range dependence
Source: PubMed Central journal article supplement (PMC6417660; doi:10.1371/journal.pcbi.1006425), 2019-03-14
Supplement: pcbi.1006425.s001.pdf [file pcbi.1006425.s001.pdf]

**Table S1. Different models for covariate effects on the transition probabilities between behavioural states.** The predictors  $\eta_{ij}$  relate to the transition probabilities.

| Model | $\eta_{12}^{(t)}$                                                               | $\eta_{13}^{(t)}$                                                               | $\eta_{21}^{(t)}$                                                            | $\eta_{23}^{(t)}$                                                            | $\eta_{31}^{(t)}$                                                        | $\eta_{32}^{(t)}$                                                        |
|-------|---------------------------------------------------------------------------------|---------------------------------------------------------------------------------|------------------------------------------------------------------------------|------------------------------------------------------------------------------|--------------------------------------------------------------------------|--------------------------------------------------------------------------|
| 1     | $\alpha_{00} + \alpha_{10}\tau_t + \alpha_{20}\tau_t^2 + \sum_i \delta_{i0}h_i$ | $\alpha_{01} + \alpha_{11}\tau_t + \alpha_{21}\tau_t^2 + \sum_i \delta_{i1}h_i$ | $\beta_{00} + \beta_{10}\tau_t + \beta_{20}\tau_t^2 + \sum_i \theta_{i0}h_i$ | $\beta_{01} + \beta_{11}\tau_t + \beta_{21}\tau_t^2 + \sum_i \theta_{i1}h_i$ | $\gamma_{00} + \gamma_{10}d_t + \gamma_{20}d_t^2 + \sum_i \zeta_{i0}h_i$ | $\gamma_{01} + \gamma_{11}d_t + \gamma_{21}d_t^2 + \sum_i \zeta_{i1}h_i$ |
| 2     | $\alpha_{00} + \sum_i \delta_{i0}h_i$                                           | $\alpha_{01} + \sum_i \delta_{i1}h_i$                                           | $\beta_{00} + \sum_i \theta_{i0}h_i$                                         | $\beta_{01} + \sum_i \theta_{i1}h_i$                                         | $\gamma_{00} + \sum_i \zeta_{i0}h_i$                                     | $\gamma_{01} + \sum_i \zeta_{i1}h_i$                                     |
| 3     | $\alpha_{00} + \alpha_{10}\tau_t + \alpha_{20}\tau_t^2$                         | $\alpha_{01} + \alpha_{11}\tau_t + \alpha_{21}\tau_t^2$                         | $\beta_{00} + \beta_{10}\tau_t + \beta_{20}\tau_t^2$                         | $\beta_{01} + \beta_{11}\tau_t + \beta_{21}\tau_t^2$                         | $\gamma_{00} + \gamma_{10}d_t + \gamma_{20}d_t^2 + \sum_i \zeta_{i0}h_i$ | $\gamma_{01} + \gamma_{11}d_t + \gamma_{21}d_t^2 + \sum_i \zeta_{i1}h_i$ |
| 4     | $\alpha_{00} + \alpha_{10}\tau_t + \alpha_{20}\tau_t^2$                         | $\alpha_{01} + \alpha_{11}\tau_t + \alpha_{21}\tau_t^2$                         | $\beta_{00} + \beta_{10}\tau_t + \beta_{20}\tau_t^2$                         | $\beta_{01} + \beta_{11}\tau_t + \beta_{21}\tau_t^2$                         | $\gamma_{00} + \gamma_{10}d_t + \gamma_{20}d_t^2$                        | $\gamma_{01} + \gamma_{11}d_t + \gamma_{21}d_t^2$                        |
| 5     | $\alpha_{00}$                                                                   | $\alpha_{01}$                                                                   | $\beta_{00}$                                                                 | $\beta_{01}$                                                                 | $\gamma_{00}$                                                            | $\gamma_{01}$                                                            |
| 6     | $\alpha_{00} + \alpha_{10}\tau_t$                                               | $\alpha_{01} + \alpha_{11}\tau_t$                                               | $\beta_{00} + \beta_{10}\tau_t$                                              | $\beta_{01} + \beta_{11}\tau_t$                                              | $\gamma_{00} + \gamma_{10}b_t$                                           | $\gamma_{01} + \gamma_{11}b_t$                                           |
| 7     | $\alpha_{00} + \alpha_{10}\tau_t$                                               | $\alpha_{01} + \alpha_{11}\tau_t$                                               | $\beta_{00} + \beta_{10}\tau_t$                                              | $\beta_{01} + \beta_{11}\tau_t$                                              | $\gamma_{00} + \gamma_{10}d_t$                                           | $\gamma_{01} + \gamma_{11}d_t$                                           |
| 8     | $\alpha_{00} + \alpha_{10}\tau_t + \alpha_{20}\tau_t^2$                         | $\alpha_{01} + \alpha_{11}\tau_t + \alpha_{21}\tau_t^2$                         | $\beta_{00}$                                                                 | $\beta_{01} + \beta_{11}\tau_t + \beta_{21}\tau_t^2$                         | $\gamma_{00} + \gamma_{10}d_t + \gamma_{20}d_t^2$                        | $\gamma_{01} + \gamma_{11}d_t + \gamma_{21}d_t^2$                        |
| 9     | $\alpha_{00}$                                                                   | $\alpha_{01} + \alpha_{11}\tau_t + \alpha_{21}\tau_t^2$                         | $\beta_{00}$                                                                 | $\beta_{01} + \beta_{11}\tau_t + \beta_{21}\tau_t^2$                         | $\gamma_{00} + \gamma_{10}d_t + \gamma_{20}d_t^2$                        | $\gamma_{01} + \gamma_{11}d_t + \gamma_{21}d_t^2$                        |
| 10    | $\alpha_{00} + \alpha_{10}\tau_t$                                               | $\alpha_{01} + \alpha_{11}\tau_t + \alpha_{21}\tau_t^2$                         | $\beta_{00} + \beta_{10}\tau_t$                                              | $\beta_{01} + \beta_{11}\tau_t + \beta_{21}\tau_t^2$                         | $\gamma_{00} + \gamma_{10}d_t + \gamma_{20}d_t^2$                        | $\gamma_{01} + \gamma_{11}d_t + \gamma_{21}d_t^2$                        |
| 11    | $\alpha_{10}\tau_t + \alpha_{20}\tau_t^2 + \sum_i \delta_{i0}h_i$               | $\alpha_{11}\tau_t + \alpha_{21}\tau_t^2 + \sum_i \delta_{i1}h_i$               | $\beta_{10}\tau_t + \beta_{20}\tau_t^2 + \sum_i \theta_{i0}h_i$              | $\beta_{11}\tau_t + \beta_{21}\tau_t^2 + \sum_i \theta_{i1}h_i$              | $\gamma_{10}d_t + \gamma_{20}d_t^2 + \sum_i \zeta_{i0}h_i$               | $\gamma_{11}d_t + \gamma_{21}d_t^2 + \sum_i \zeta_{i1}h_i$               |
| 12    | $\alpha_{00} + \alpha_{10}\tau_t + \alpha_{20}\tau_t^2$                         | $\alpha_{01} + \alpha_{11}\tau_t + \alpha_{21}\tau_t^2 + \sum_i \delta_{i1}h_i$ | $\beta_{00} + \beta_{10}\tau_t + \beta_{20}\tau_t^2$                         | $\beta_{01} + \beta_{11}\tau_t + \beta_{21}\tau_t^2 + \sum_i \theta_{i1}h_i$ | $\gamma_{00} + \gamma_{10}d_t + \gamma_{20}d_t^2 + \sum_i \zeta_{i0}h_i$ | $\gamma_{01} + \gamma_{11}d_t + \gamma_{21}d_t^2 + \sum_i \zeta_{i1}h_i$ |
| 13    | $\alpha_{00}$                                                                   | $\alpha_{01} + \alpha_{11}\tau_t + \alpha_{21}\tau_t^2$                         | $\beta_{00}$                                                                 | $\beta_{01} + \beta_{11}\tau_t + \beta_{21}\tau_t^2$                         | $\gamma_{00} + \gamma_{10}d_t + \gamma_{20}d_t^2 + \sum_i \zeta_{i0}h_i$ | $\gamma_{01} + \gamma_{11}d_t + \gamma_{21}d_t^2 + \sum_i \zeta_{i0}h_i$ |
| 14    | $\alpha_{00} + \sum_i \delta_{i0}h_i$                                           | $\alpha_{01} + \alpha_{11}\tau_t + \alpha_{21}\tau_t^2 + \sum_i \delta_{i1}h_i$ | $\beta_{00} + \sum_i \theta_{i0}h_i$                                         | $\beta_{01} + \beta_{11}\tau_t + \beta_{21}\tau_t^2 + \sum_i \theta_{i1}h_i$ | $\gamma_{00} + \gamma_{10}d_t + \gamma_{20}d_t^2$                        | $\gamma_{01} + \gamma_{11}d_t + \gamma_{21}d_t^2 + \sum_i \zeta_{i1}h_i$ |
